# Supplementary material for: Chemical transport model simulations of organic aerosol in southern California: model evaluation and gasoline and diesel source contributions
Source: Copernicus journal article supplement (doi:10.5194/acp-17-4305-2017), 2017-03-30
Supplement: Supplementary file [file acp-17-4305-2017-supplement.pdf]

Supplement of Atmos. Chem. Phys., 17, 4305–4318, 2017  
<http://www.atmos-chem-phys.net/17/4305/2017/>  
doi:10.5194/acp-17-4305-2017-supplement  
© Author(s) 2017. CC Attribution 3.0 License.

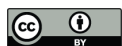

Atmospheric  
Chemistry  
and Physics  
Open Access  
EGU

*Supplement of*

## **Chemical transport model simulations of organic aerosol in southern California: model evaluation and gasoline and diesel source contributions**

**Shantanu H. Jathar et al.**

*Correspondence to:* Shantanu H. Jathar ([shantanu.jathar@colostate.edu](mailto:shantanu.jathar@colostate.edu)) and Allen L. Robinson ([alr@andrew.cmu.edu](mailto:alr@andrew.cmu.edu))

The copyright of individual parts of the supplement might differ from the CC-BY 3.0 licence.

1 Table S1 Normalized mass emissions profiles for gasoline and diesel (columns 2 and 3) that map to CB05 model  
 2 species in CMAQ for the VBS-IVOC simulation. Normalized emissions profiles for the Traditional and VBS  
 3 simulations are provided in the supplementary material. SOA mass yields for CB05 model species for high and low  
 4 NO<sub>x</sub> conditions are listed in columns 3 through 10.

| Species          | Gasoline | Diesel | C* (high NO <sub>x</sub> yields) |       |       |       | C* (low NO <sub>x</sub> yields) |       |       |       |
|------------------|----------|--------|----------------------------------|-------|-------|-------|---------------------------------|-------|-------|-------|
|                  |          |        | 1                                | 10    | 100   | 1000  | 1                               | 10    | 100   | 1000  |
| ALD2             | 0.0009   | 0.0020 | Do not produce SOA               |       |       |       | Do not produce SOA              |       |       |       |
| ALDX             | 0.0023   | 0.0131 |                                  |       |       |       |                                 |       |       |       |
| CH4              | 0.1816   | 0.0000 |                                  |       |       |       |                                 |       |       |       |
| ETH              | 0.0571   | 0.1911 |                                  |       |       |       |                                 |       |       |       |
| ETHA             | 0.0206   | 0.0173 |                                  |       |       |       |                                 |       |       |       |
| FORM             | 0.0030   | 0.0150 |                                  |       |       |       |                                 |       |       |       |
| IOLE             | 0.0094   | 0.0103 |                                  |       |       |       |                                 |       |       |       |
| OLE              | 0.0282   | 0.0596 |                                  |       |       |       |                                 |       |       |       |
| PAR              | 0.2670   | 0.3669 |                                  |       |       |       |                                 |       |       |       |
| UNR              | 0.0154   | 0.0429 |                                  |       |       |       |                                 |       |       |       |
| TOL              | 0.0574   | 0.0262 | 0.011                            | 0.257 | 0.482 | 0.718 | 0.011                           | 0.257 | 0.75  | 0.468 |
| XYL              | 0.0844   | 0.0200 | 0.002                            | 0.195 | 0.3   | 0.435 | 0.075                           | 0.3   | 0.375 | 0.525 |
| IVOC (gasoline)* | 0.2723   | 0.0000 | 0.014                            | 0.059 | 0.22  | 0.4   | 0.014                           | 0.059 | 0.22  | 0.4   |
| IVOC (diesel)*   | 0.0000   | 0.2330 | 0.044                            | 0.071 | 0.41  | 0.3   | 0.044                           | 0.071 | 0.41  | 0.3   |
| ISOP             | 0.0003   | 0.0014 | 0                                | 0.023 | 0.015 | 0     | 0.009                           | 0.03  | 0.015 | 0     |
| TERP             | 0.0000   | 0.0011 | 0.012                            | 0.122 | 0.201 | 0.507 | 0.107                           | 0.092 | 0.359 | 0.608 |
| ALK5**           | 0.0988   | 0.0508 | 0                                | 0.15  | 0     | 0     | 0                               | 0.30  | 0     | 0     |
| BENZ**           | 0.0345   | 0.0256 | 0.003                            | 0.165 | 0.3   | 0.435 | 0.075                           | 0.225 | 0.375 | 0.525 |

5 \*IVOCs are assumed to have identical SOA mass yields for both low and high NO<sub>x</sub> conditions

6 \*\*In CB05, all alkanes are represented using the PAR species and benzene is not modeled as an explicit species in  
 7 terms of gas-phase interactions. In the VBS-IVOC simulation, we consider emissions and SOA formation from the  
 8 species ALK5 (representing long alkanes) and BENZ (benzene).  
 9

10 Table S2: Total emissions (tons) from May 4 to June 30, 2010 for NMOG, POA, BTEX (aromatics), ALK5 (long  
 11 alkanes) and IVOCs (unspeciated SOA precursors) for all sources in the Los Angeles and Orange Counties for the  
 12 three OA models: Traditional, VBS and VBS-IVOC.

| Sources    | Traditional |      |      |        | VBS   |      |      |        | VBS-IVOC |      |      |        |                   |
|------------|-------------|------|------|--------|-------|------|------|--------|----------|------|------|--------|-------------------|
|            | NMOG        | POA  | BTEX | IVOC** | NMOG  | POA  | BTEX | IVOC** | NMOG     | POA  | BTEX | IVOC** | ALK5 <sup>#</sup> |
| Gasoline   | 11508       | 396  | 1986 | 0      | 12103 | 396  | 3360 | 595    | 11508    | 396  | 2513 | 2122   | 770               |
| - On-road  | 6650        | 224  | 1172 | 0      | 6985  | 224  | 1831 | 336    | 6650     | 224  | 1395 | 1059   | 384               |
| - Off-road | 4859        | 172  | 814  | 0      | 5118  | 173  | 1529 | 259    | 4859     | 173  | 1118 | 1063   | 386               |
| Diesel*    | 917         | 112  | 26   | 0      | 1085  | 112  | 67   | 168    | 917      | 112  | 60   | 102    | 22                |
| - On-road  | 574         | 85   | 19   | 0      | 702   | 85   | 43   | 128    | 574      | 85   | 40   | 47     | 10                |
| - Off-road | 343         | 27   | 7    | 0      | 383   | 27   | 24   | 40     | 343      | 27   | 20   | 56     | 12                |
| Other*     | 14476       | 839  | 1427 | 0      | 15748 | 848  | 2256 | 1273   | 14476    | 848  | 2254 | 1273   | 0                 |
| Total      | 26901       | 1346 | 3438 | 0      | 28937 | 1357 | 5684 | 2035   | 26901    | 1357 | 4827 | 3497   | 792               |
| Biogenics  | 13531       | 0    | 0    | 0      | 13531 | 0    | 0    | 0      | 13531    | 0    | 0    | 0      | 0                 |

13 \*Does not include diesel engines used in railroad, marine and airport ground support equipment applications. These  
14 sources are linked to an emissions profile other than 8774.  
15 \*\*As described in the main manuscript, IVOCs are the same as the unspecified SOA precursors.  
16 #ALK5 as an SOA precursor is only included in the VBS-IVOC model  
17

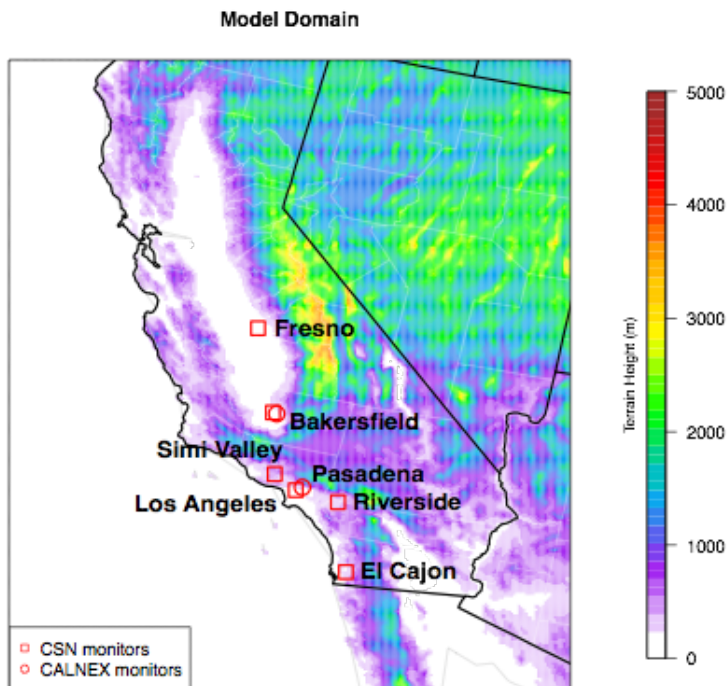

18  
19 Figure S1: Model domain considered for the CMAQ simulations and locations of measurement sites.  
20

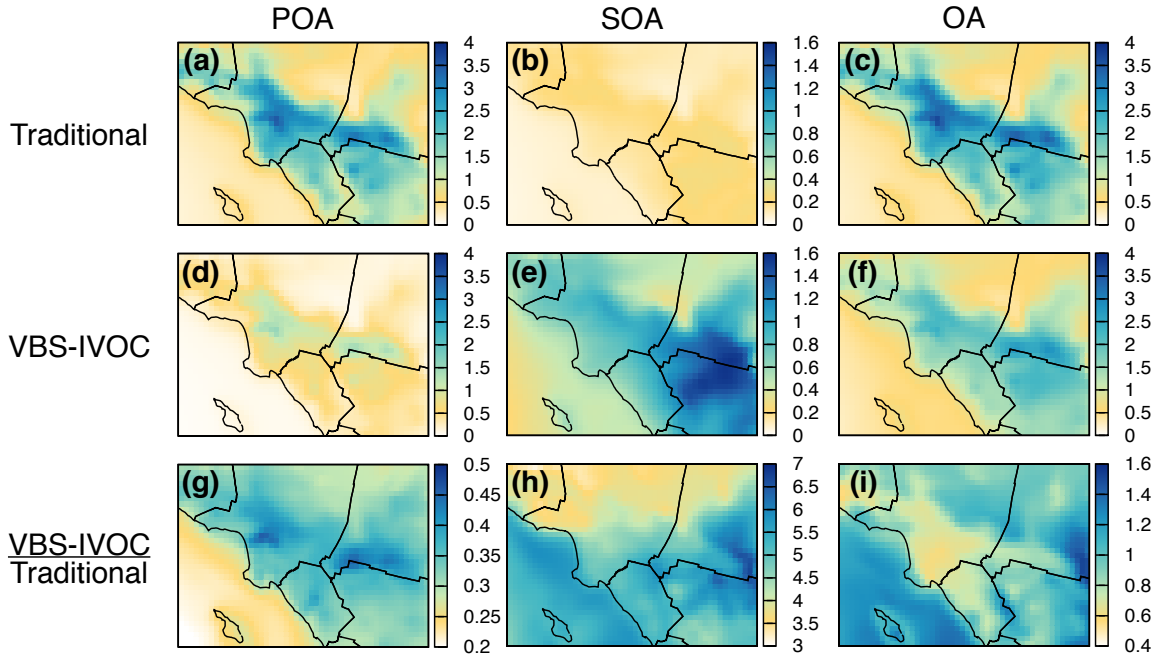

21  
22  
23  
24  
25  
26  
27

Figure S2: Comparison of campaign-averaged predictions of the Traditional model of [Baker et al. \(2015\)](#) and VBS-IVOC model. Left hand column (a, d, g) is primary organic aerosol (POA); middle column (b, e, h) is secondary organic aerosol (SOA); right hand column (c, f, i) is total organic aerosol (POA + SOA). Top row (a-c) shows predictions of the Traditional model; middle row (d-f) shows predictions of the VBS-IVOC model; bottom row (g-i) shows the ratio of the two model predictions.

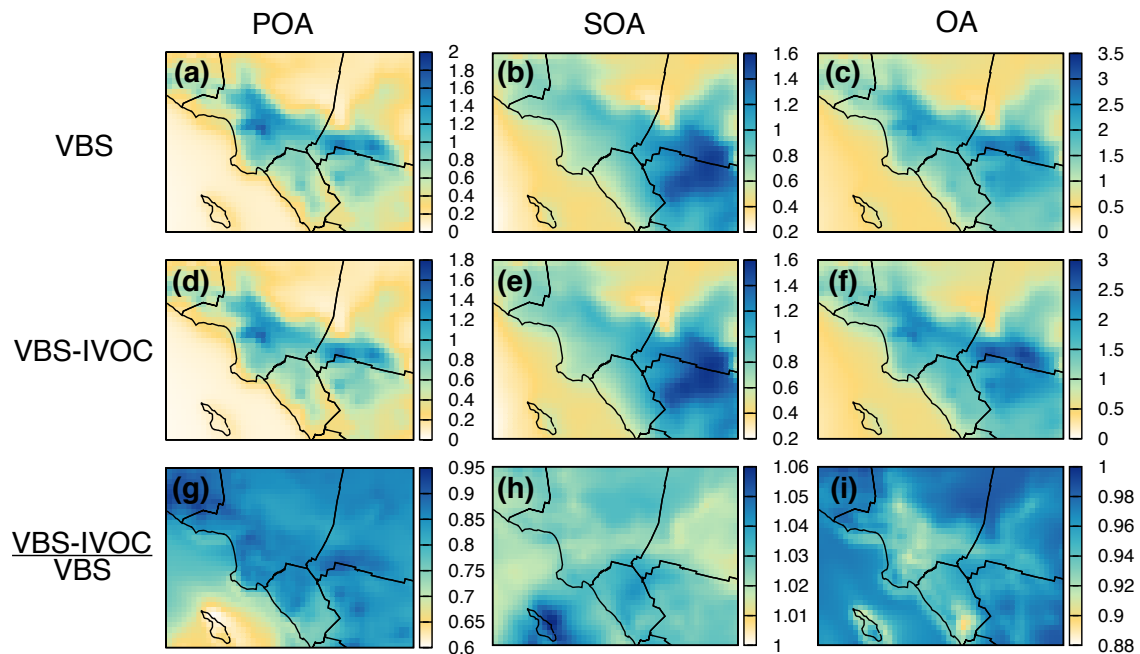

28  
29  
30  
31  
32  
33

Figure S3: Comparison of campaign-averaged predictions of the VBS model of [Woody et al. \(2016\)](#) and VBS-IVOC model. Left hand column (a, d, g) is primary organic aerosol (POA); middle column (b, e, h) is secondary organic aerosol (SOA); right hand column (c, f, i) is total organic aerosol (POA + SOA). Top row (a-c) shows predictions of the VBS model; middle row (d-f) shows predictions of the VBS-IVOC model; bottom row (g-i) shows the ratio of the two model predictions.

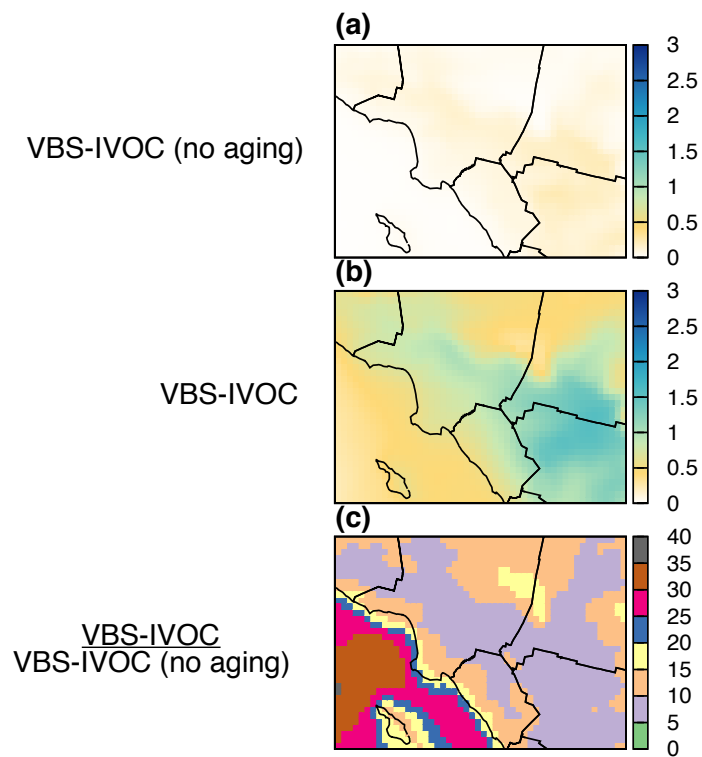

34  
 35  
 36  
 37

Figure S4: Comparison of campaign-averaged predictions of OA for the VBS-IVOC model (a) without aging reactions, (b) with aging reactions and (c) ratio of aging to no aging.
